# Supplementary material for: Curcumin-Loaded Hydrophobic Surface-Modified Hydroxyapatite as an Antioxidant for Sarcopenia Prevention
Source: MDPI journal article supplement (doi:10.3390/antiox10040616), 2021-04-16
Supplement: s1 [file s1]

**Table 1.** Primers for Real-time PCR.

| Primer                | Sequence (5' → 3')         |
|-----------------------|----------------------------|
| GAPDH forward         | TGGAAAGCTGTGGCGTGAT        |
| GAPDH reverse         | TGCTTCACCACCTTCTTGAT       |
| TNF- $\alpha$ forward | GATCGGTCCCCAAAGGGATG       |
| TNF- $\alpha$ reverse | TGAGGGTCTGGGCCATAGAA       |
| IL-6 forward          | GCTACCAAACCTGGATATAATCAGGA |
| IL-6 reverse          | CCAGGTAGCTATGGTACTCCAGAA   |
| Atrogin-1 forward     | GAGGCAGATTTCGCAAGCGTTTGAT  |
| Atrogin-1 reverse     | TCCAGGAGAGAATGTGGCAGTGTT   |

**Table S2.** Chemical composition of HAP, SHAP and Cur-SHAP from EDS analysis by atomic ratio. The molar ratio of calcium to phosphorus in the Cur-SHAP that was 1.42.

| Sample   | C        | O        | P        | Ca       | Ca/P |
|----------|----------|----------|----------|----------|------|
|          | Atomic % | Atomic % | Atomic % | Atomic % |      |
| HAP      | 17.92    | 53.78    | 10.62    | 17.69    | 1.6  |
| SHAP     | 6.08     | 59.68    | 13.42    | 20.82    | 1.5  |
| Cur-SHAP | 51.01    | 38.70    | 4.24     | 6.05     | 1.4  |

**Table S3.** Safety of Cur-SHAP in vivo by blood element analysis. Reference: Charles River Laboratories, CD® IGS Rat Model Information Sheet. All results indicated no sign of chronic toxicity in Cur-SHAP.

|                  | Control          | LPS              | LPS-BSP-HAP      |
|------------------|------------------|------------------|------------------|
| RBC (M/ $\mu$ L) | 9.23 $\pm$ 0.48  | 8.24 $\pm$ 0.21  | 8.96 $\pm$ 0.09  |
| HGB (g/dL)       | 16.10 $\pm$ 0.56 | 14.25 $\pm$ 0.35 | 16.10 $\pm$ 0.14 |
| HCT (%)          | 53.15 $\pm$ 2.89 | 46.10 $\pm$ 0.70 | 51.60 $\pm$ 0.70 |

|             |                |                 |                 |
|-------------|----------------|-----------------|-----------------|
| MCV (fL)    | 57.60 ± 0.14   | 55.95 ± 0.63    | 57.55 ± 0.07    |
| MCH (pg)    | 17.45 ± 0.35   | 17.30 ± 0.01    | 17.95 ± 0.07    |
| MCHC (g/dL) | 30.30 ± 0.56   | 30.90 ± 0.28    | 31.20 ± 0.14    |
| RET (K/ µL) | 249.10 ± 7.77  | 243.50 ± 6.92   | 197.60 ± 4.10   |
| PLT (K/ µL) | 1032.50 ± 7.77 | 1284.50 ± 54.85 | 1195.50 ± 24.74 |
| WBC (K/ µL) | 15.95 ± 0.62   | 19.99 ± 0.82    | 12.90 ± 0.26    |
| NEUT (%)    | 11.90 ± 0.28   | 23.65 ± 17.04   | 22.80 ± 0.56    |
| LYMPH (%)   | 76.35 ± 0.49   | 83.50 ± 7.77    | 70.50 ± 1.27    |
| MONO (%)    | 5.80 ± 0.84    | 7.15 ± 0.21     | 5.30 ± 0.56     |
| EO (%)      | 0.50 ± 0.01    | 1.25 ± 1.20     | 1.15 ± 0.07     |
| BASO (%)    | 0.20 ± 0.01    | 0.15 ± 0.07     | 0.25 ± 0.07     |

---

RBC: red blood cell; HGB: hemoglobin; HCT: hematocrit; MCV: mean corpuscular volume; MCH: mean corpuscular hemoglobin; MCHC: mean corpuscular hemoglobin concentration; PLT: platelet; WBC: white blood cell; NEUT: neutrophil; LYMPH: lymphocyte; MONO: monocyte; EO: eosinophil; BASO: basophil.

---

|                  | Control            | LPS                 | LPS-Cur-SHAP        |
|------------------|--------------------|---------------------|---------------------|
| RBC (M/ $\mu$ L) | 9.23 $\pm$ 0.48    | 8.24 $\pm$ 0.21     | 8.96 $\pm$ 0.09     |
| HGB (g/dL)       | 16.10 $\pm$ 0.56   | 14.25 $\pm$ 0.35    | 16.10 $\pm$ 0.14    |
| HCT (%)          | 53.15 $\pm$ 2.89   | 46.10 $\pm$ 0.70    | 51.60 $\pm$ 0.70    |
| MCV (fL)         | 57.60 $\pm$ 0.14   | 55.95 $\pm$ 0.63    | 57.55 $\pm$ 0.07    |
| MCH (pg)         | 17.45 $\pm$ 0.35   | 17.30 $\pm$ 0.01    | 17.95 $\pm$ 0.07    |
| MCHC (g/dL)      | 30.30 $\pm$ 0.56   | 30.90 $\pm$ 0.28    | 31.20 $\pm$ 0.14    |
| RET (K/ $\mu$ L) | 249.10 $\pm$ 7.77  | 243.50 $\pm$ 6.92   | 197.60 $\pm$ 4.10   |
| PLT (K/ $\mu$ L) | 1032.50 $\pm$ 7.77 | 1284.50 $\pm$ 54.85 | 1195.50 $\pm$ 24.74 |
| WBC (K/ $\mu$ L) | 15.95 $\pm$ 0.62   | 19.99 $\pm$ 0.82    | 12.90 $\pm$ 0.26    |
| NEUT (%)         | 11.90 $\pm$ 0.28   | 23.65 $\pm$ 17.04   | 22.80 $\pm$ 0.56    |
| LYMPH (%)        | 76.35 $\pm$ 0.49   | 83.50 $\pm$ 7.77    | 70.50 $\pm$ 1.27    |
| MONO (%)         | 5.80 $\pm$ 0.84    | 7.15 $\pm$ 0.21     | 5.30 $\pm$ 0.56     |
| EO (%)           | 0.50 $\pm$ 0.01    | 1.25 $\pm$ 1.20     | 1.15 $\pm$ 0.07     |
| BASO (%)         | 0.20 $\pm$ 0.01    | 0.15 $\pm$ 0.07     | 0.25 $\pm$ 0.07     |

RBC: red blood cell; HGB: hemoglobin; HCT: hematocrit; MCV: mean corpuscular volume; MCH: mean corpuscular hemoglobin; MCHC: mean corpuscular hemoglobin concentration; PLT: platelet; WBC: white blood cell; NEUT: neutrophil; LYMPH: lymphocyte; MONO: monocyte; EO: eosinophil; BASO: basophil.
